# Supplementary material for: The human mitochondrial ribosome recycling factor is essential for cell viability
Source: PubMed Central journal article supplement — Nucleic Acids Res. 2008 Sep 9;36(18):5787–99. doi: 10.1093/nar/gkn576 (PMC2566884; doi:10.1093/nar/gkn576), 2008-09-09

# Fig S1

**A** 10 min after purification

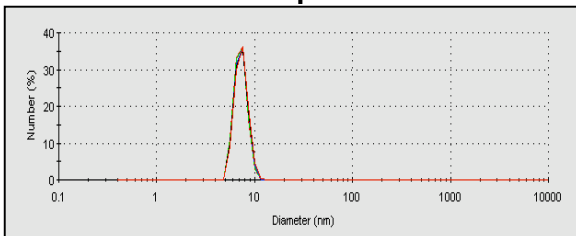

**B** 1 h after purification

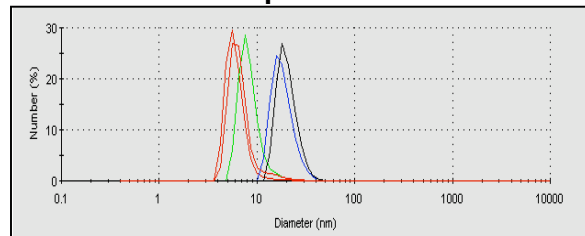

**C** 1 day

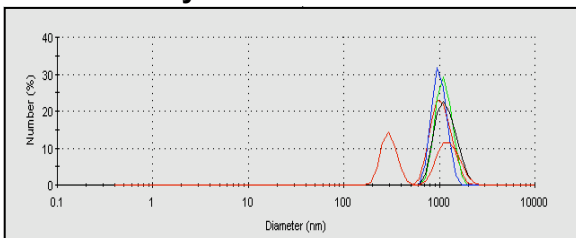

**D** 1 day; 100 mM arginine

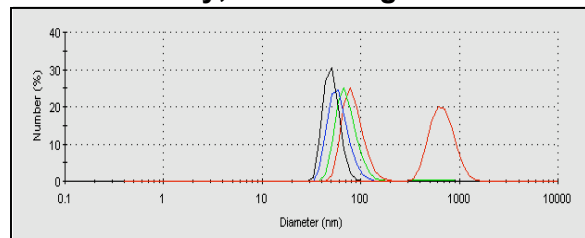

**E** 1 day; 0.1% Tween, 20 % glycerol

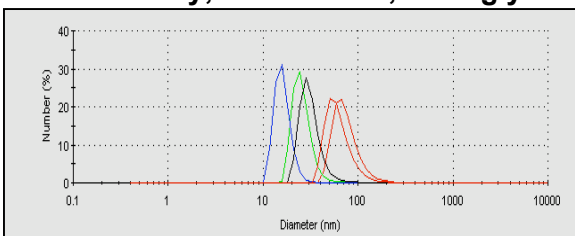

**F** 1 day; 0.5 M NaCl, 20% glycerol

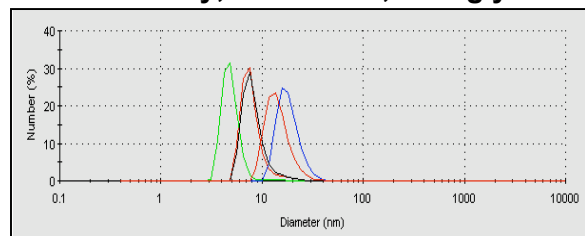

Supplement: gkn576_1.pdf [file gkn576_1.pdf]
