# Supplementary material for: The human mitochondrial ribosome recycling factor is essential for cell viability
Source: PubMed Central journal article supplement — Nucleic Acids Res. 2008 Sep 9;36(18):5787–99. doi: 10.1093/nar/gkn576 (PMC2566884; doi:10.1093/nar/gkn576), 2008-09-09
Supplement: gkn576_4.pdf [file gkn576_4.pdf]

# Fig S4

## A

```

Homo sapiens      MALGLKCFRMVHPTFRNYLAASIRPVSEVTLKTVHERQHGHHRQYMAYSAVVRHFATKKAKAKGKGQSQTRVNI AALVEDI INLEEVNEEMKSVIE
S. pombe          -----MFR IISKA--TLFQDSQRFHTSILSP---RCAPFNGGIL-----HKKAKDKDVKHDHDEPANSFNKML--KSF E--AKMQLVHE
S. cerevisiae     -----MILTARLNCRPVTVPRLFNRFSQSFII-----LKKKSSTPTEKVEEDEIDVNE LL-----KKAETQF KKTLE

Homo sapiens      ALKDNFNKTLNIRTS P G S L D K I-----AVVTADGKLALNQISQISMKSPQLILVNMA SFPECTAAA IKAIRESGMNLNPEV--EGTLIRVPIQ
S. pombe          KLAKRFQEAVVLP-SQGNFTQLEALFIPSKSIKAPTPSRLREIAAVSQKGSQQIIRPFE-DVDIKNILKAIEDSRYPFVANKLNAST-IEVK-PQ
S. cerevisiae     IQKQKMEIKQGNFNPVFNLSL-----VF---KNNRKFTDIATTS LKGNALLITVFD- DKVKTVISGVLAANLNLTPERVPNNDLQKVS LP

Homo sapiens      -VTR E H R E M L V K-----LAKQNTNKAKDS---LRKVR T N S M N---KLK K S K D T V S E D T I I L I E K Q I S Q M A D D T V A E L D R H L A V K T K E L G
S. pombe          R T T L E S R Q Q L A K-----VLEGYAKDSREQLSAMRTELKKEIAK N K K S K A W T S D D C Y -K A E A E M Q T A F K N A I N L D S G L K S A L K K V I -
S. cerevisiae     P P T E S R L K V A K D L K R V F E E Y K Q S S L K D S ---L G T I R G S I L K E F K S F K K-----D D A V K A E R D L E K L H K D Y V N K L H D Q F Q K V E K S I V K

```

## B

Data of full length pairwise alignments  
from <http://www.ebi.ac.uk/emboss/align/>

|                      | <i>E. coli</i> | <i>S. cerevisiae</i> | <i>S. pombe</i> |
|----------------------|----------------|----------------------|-----------------|
| <i>H. sapiens</i>    | 21.3           | 16.8                 | 21.1            |
| <i>S. pombe</i>      | 17.4           | 23.0                 |                 |
| <i>S. cerevisiae</i> | 18.7           |                      |                 |
