# Supplementary material for: The human mitochondrial ribosome recycling factor is essential for cell viability
Source: PubMed Central journal article supplement — Nucleic Acids Res. 2008 Sep 9;36(18):5787–99. doi: 10.1093/nar/gkn576 (PMC2566884; doi:10.1093/nar/gkn576), 2008-09-09
Supplement: gkn576_5.pdf [file gkn576_5.pdf]

| GROUP             | UNIPROT  | ENTREZ_ID | REFSEQ_ID      | PROTEIN_NAME                                                                                       | GENE     | Class I | Class II | Class III | MITOPRED | WOLF PSORT | CELLO2 | PREDOTAR |
|-------------------|----------|-----------|----------------|----------------------------------------------------------------------------------------------------|----------|---------|----------|-----------|----------|------------|--------|----------|
| Protein Group 42  | Q519A4   | 75677353  | NP_114127.3    | AAA-ATPase TOB3                                                                                    | ATAD3B   |         |          |           |          |            | 1      |          |
| Protein Group 125 | P24752   | 4557237   | NP_000010.1    | acetyl-Coenzyme A acetyltransferase 1 precursor                                                    | ACAT1    |         |          | 1         | 1        | 1          |        | 1        |
| Protein Group 576 | P49748-2 | 76496475  | NP_001029031.1 | acyl-Coenzyme A dehydrogenase, very long chain isoform 2 precursor                                 | ACADVL   | 1       |          |           | 1        | 1          |        | 1        |
| Protein Group 56  | Q91390   | 8129304   | NP_001028755.2 | acyl-Coenzyme A thioesterase 2, mitochondrial isoform b                                            | ACOT3    |         |          |           | 1        | 1          |        | 1        |
| Protein Group 88  | Q9Y4W6   | 5802970   | NP_006787.1    | AFG3 ATPase family gene 3-like 2                                                                   | AFG3L2   |         |          |           | 1        | 1          |        | 1        |
| Protein Group 326 | P24539   | 21361565  | NP_001679.2    | ATP synthase, H+ transporting, mitochondrial FO complex, subunit B1 precursor                      | ATP5F1   |         |          |           | 1        | 1          |        | 1        |
| Protein Group 397 | Q75947   | 5453559   | NP_006347.1    | ATP synthase, H+ transporting, mitochondrial FO complex, subunit d isoform a                       | ATP5D    |         |          | 1         |          |            |        |          |
| Protein Group 571 | P56134   | 85794908  | NP_001034267.1 | ATP synthase, H+ transporting, mitochondrial FO complex, subunit F2 isoform 2d                     | ATP5J2   |         |          |           |          |            |        | 1        |
| Protein Group 633 | Q75964   | 51479156  | NP_006467.4    | ATP synthase, H+ transporting, mitochondrial FO complex, subunit G                                 | ATP5L    |         |          |           | 1        |            |        | 1        |
| Protein Group 30  | P25705   | 4757810   | NP_004037.1    | ATP synthase, H+ transporting, mitochondrial F1 complex, alpha subunit precursor                   | ATP5A1   |         |          | 1         | 1        | 1          |        | 1        |
| Protein Group 26  | Q96576   | 32189394  | NP_001677.2    | ATP synthase, H+ transporting, mitochondrial F1 complex, beta subunit precursor                    | ATP5B    | 1       |          |           | 1        | 1          |        | 1        |
| Protein Group 514 | P30049   | 50345991  | NP_001001975.1 | ATP synthase, H+ transporting, mitochondrial F1 complex, delta subunit precursor                   | ATP5D    |         |          |           | 1        | 1          |        | 1        |
| Protein Group 292 | P36542   | 50345988  | NP_001001973.1 | ATP synthase, H+ transporting, mitochondrial F1 complex, gamma subunit isoform L (liver) precursor | ATP5C1   |         |          |           | 1        | 1          |        | 1        |
| Protein Group 23  | Q9NVV7   | 42476028  | NP_060658.2    | ATPase family, AAA domain containing 3A                                                            | ATAD3A   |         | 1        |           |          |            |        | 1        |
| Protein Group 189 | Q9H51-2  | 20070384  | NP_612642.1    | Bcl-XL-binding protein v68                                                                         | PGAM5    |         | 1        |           |          |            |        | 1        |
| Protein Group 19  | P10809   | 41399285  | NP_955472.1    | chaperonin                                                                                         | HSPD1    |         | 1        |           | 1        | 1          |        | 1        |
| Protein Group 341 | Q76031   | 7242140   | NP_006651.2    | CbpX caseinolytic protease X homolog                                                               | CLPX     |         |          |           | 1        | 1          |        | 1        |
| Protein Group 215 | Q07021   | 4502491   | NP_0011203.1   | complement component 1, q subcomponent binding protein precursor                                   | C1QB     | 1       |          |           | 1        | 1          |        | 1        |
| Protein Group 92  | Q9NLL7   | 8922976   | NP_060850.1    | DEAD (Asp-Glu-Ala-Asp) box polypeptide 28                                                          | DDX28    |         |          |           | 1        | 1          |        | 1        |
| Protein Group 13  | Q72753   | 20336290  | NP_055781.2    | DEAH (Asp-Glu-Ala-His) box polypeptide 30 isoform 2                                                | DHX30    | 1       |          |           | 1        | 1          |        | 1        |
| Protein Group 55  | P51398   | 4758118   | NP_004623.1    | death-associated protein 3                                                                         | DAP3     |         |          | 1         | 1        | 1          |        | 1        |
| Protein Group 355 | Q8WT54   | 91199540  | NP_000099.2    | dihydropyrimidine dehydrogenase precursor                                                          | DLD      |         |          |           | 1        | 1          |        | 1        |
| Protein Group 296 | Q96Y15   | 31711952  | NP_001922.2    | dihydropyrimidine S-acetyltransferase (E2 component of pyruvate dehydrogenase complex)             | DLAT     |         |          |           | 1        | 1          |        | 1        |
| Protein Group 184 | Q7LD07   | 19923748  | NP_001324.2    | dihydropyrimidine S-acyltransferase (E2 component of 2-oxo-glutarate complex)                      | DLS1T    |         |          |           | 1        | 1          |        | 1        |
| Protein Group 416 | Q9Y257   | 7661672   | NP_056399.1    | DNA polymerase delta interacting protein 2                                                         | POLDIP2  | 1       |          |           | 1        | 1          |        | 1        |
| Protein Group 121 | Q96EY1   | 31542539  | NP_005138.2    | DnaJ (Hsp40) homolog, subfamily A, member 3                                                        | DNAJA3   | 1       |          |           | 1        | 1          |        | 1        |
| Protein Group 234 | Q75616   | 24307899  | NP_005693.1    | Era G-protein-like 1                                                                               | ERAL1    |         |          |           | 1        | 1          |        | 1        |
| Protein Group 452 | P00367   | 4885281   | NP_005262.1    | glutamate dehydrogenase 1                                                                          | GLUD1    |         |          |           | 1        | 1          |        | 1        |
| Protein Group 34  | Q12849-2 | 53759145  | NP_002083.2    | G-rich RNA sequence binding factor 1                                                               | GRSF1    |         |          |           | 1        | 1          |        | 1        |
| Protein Group 600 | P01604   | 4502493   | NP_002148.1    | heat shock 100kDa protein 1 (chaperonin 10)                                                        | HSPF1    |         |          |           | 1        | 1          |        | 1        |
| Protein Group 16  | P38646   | 24234688  | NP_004125.3    | heat shock 70kDa protein 9B precursor                                                              | HSPA9    | 1       |          |           | 1        | 1          |        | 1        |
| Protein Group 25  | P49590   | 15029520  | NP_036340.1    | histidyl-tRNA synthetase-like                                                                      | HARS2    |         |          |           | 1        | 1          |        | 1        |
| Protein Group 60  | Q99714   | 4758504   | NP_004484.1    | hydroxysteroid (17-beta) dehydrogenase 10 isoform 1                                                | HSD17B10 |         |          |           | 1        | 1          |        | 1        |
| Protein Group 309 | Q14197   | 4557657   | NP_001536.1    | immature colon carcinoma transcript 1                                                              | ICT1     |         |          |           | 1        | 1          |        | 1        |
| Protein Group 226 | Q387X4   | 5803115   | NP_006830.1    | inner membrane protein, mitochondrial                                                              | IMMT     |         | 1        |           |          | 1          |        | 1        |
| Protein Group 262 | P83111   | 26051231  | NP_116246.2    | lactamase, beta isoform a / MRPL56                                                                 | LACTB    |         |          |           | 1        | 1          |        | 1        |
| Protein Group 329 | Q96A64   | 40254924  | NP_060979.2    | leucine rich repeat containing 59                                                                  | LRC59    | 1       |          |           | 1        | 1          |        | 1        |
| Protein Group 294 | Q95202   | 6912482   | NP_036450.1    | leucine zipper-EF-hand containing transmembrane protein 1                                          | LETM1    |         |          |           | 1        | 1          |        | 1        |
| Protein Group 1   | P42704   | 31621305  | NP_573566.2    | leucine-rich PPR motif-containing protein                                                          | LAPRPC   | 1       |          |           | 1        | 1          |        | 1        |
| Protein Group 127 | P23368   | 4505145   | NP_002387.1    | malic enzyme 2, NAD(+)-dependent, mitochondrial                                                    | ME2      |         |          |           | 1        | 1          |        | 1        |
| Protein Group 396 | Q6UB35   | 36796743  | NP_056255.2    | methylenetetrahydrofolate dehydrogenase (NADP+ dependent) 1-like                                   | MTHFDL1  |         |          |           | 1        | 1          |        | 1        |
| Protein Group 227 | Q9H7H0   | 12232389  | NP_073571.1    | methyltransferase 11 domain containing 1 isoform 2                                                 | MTT11D1  |         |          |           | 1        | 1          |        | 1        |
| Protein Group 385 | P49047   | 43022303  | NP_001688.1    | mitochondrial ATP synthase, O subunit precursor                                                    | ATP5O    |         |          |           | 1        | 1          |        | 1        |
| Protein Group 8   | Q00411   | 110618253 | NP_005026.3    | mitochondrial DNA-directed RNA polymerase precursor                                                | POLRMT   | 1       |          |           | 1        | 1          |        | 1        |
| Protein Group 453 | P36776   | 21396489  | NP_004784.2    | mitochondrial lon peptidase 1                                                                      | LONP1    | 1       |          |           | 1        | 1          |        | 1        |
| Protein Group 335 | ABK414   | 21735621  | NP_005099.2    | mitochondrial malate dehydrogenase precursor                                                       | MDH2     |         |          | 1         | 1        | 1          |        | 1        |
| Protein Group 133 | Q8V52    | 51243059  | NP_775738.3    | mitochondrial malonyltransferase isoform a precursor                                               | MCAT     |         |          |           | 1        | 1          |        | 1        |
| Protein Group 646 | Q9BQC6   | 13128970  | NP_076931.1    | mitochondrial ribosomal protein 63                                                                 | MRP63    |         |          |           | 1        | 1          |        | 1        |
| Protein Group 147 | Q9BYD6   | 21265084  | NP_064621.2    | mitochondrial ribosomal protein L1                                                                 | MRPL1    |         |          |           | 1        | 1          |        | 1        |
| Protein Group 525 | Q7Z7H8   | 22547114  | NP_660298.2    | mitochondrial ribosomal protein L10 isoform a                                                      | MRPL10   |         |          |           | 1        | 1          |        | 1        |
| Protein Group 183 | Q9Y3B7   | 7705618   | NP_057134.1    | mitochondrial ribosomal protein L11 isoform a                                                      | MRPL11   |         |          |           | 1        | 1          |        | 1        |
| Protein Group 237 | P52815   | 27436901  | NP_002940.2    | mitochondrial ribosomal protein L12                                                                | MRPL12   |         |          |           | 1        | 1          |        | 1        |
| Protein Group 357 | Q9BYD1   | 14165270  | NP_054797.2    | mitochondrial ribosomal protein L13                                                                | MRPL13   |         |          |           | 1        | 1          |        | 1        |
| Protein Group 382 | Q6P1L8   | 55769543  | NP_115487.2    | mitochondrial ribosomal protein L14                                                                | MRPL14   |         |          |           | 1        | 1          |        | 1        |
| Protein Group 144 | Q9P015   | 7661806   | NP_054894.1    | mitochondrial ribosomal protein L15                                                                | MRPL15   |         |          |           | 1        | 1          |        | 1        |
| Protein Group 407 | Q9NVZ0   | 8923448   | NP_060310.1    | mitochondrial ribosomal protein L16                                                                | MRPL16   |         |          |           | 1        | 1          |        | 1        |
| Protein Group 359 | Q9NRK2   | 11596859  | NP_071944.1    | mitochondrial ribosomal protein L17                                                                | MRPL17   |         |          |           | 1        | 1          |        | 1        |
| Protein Group 374 | Q9H0U6   | 21265080  | NP_054880.2    | mitochondrial ribosomal protein L18                                                                | MRPL18   |         |          |           | 1        | 1          |        | 1        |
| Protein Group 166 | P49406   | 94557305  | NP_055578.2    | mitochondrial ribosomal protein L19                                                                | MRPL19   |         |          |           | 1        | 1          |        | 1        |
| Protein Group 247 | Q5T653   | 21265070  | NP_057034.2    | mitochondrial ribosomal protein L2                                                                 | MRPL2    |         |          |           | 1        | 1          |        | 1        |
| Protein Group 535 | Q9BYC9   | 26638657  | NP_060441.2    | mitochondrial ribosomal protein L20                                                                | MRPL20   |         |          |           | 1        | 1          |        | 1        |
| Protein Group 303 | ABNKU0   | 31652226  | NP_852615.1    | mitochondrial ribosomal protein L21 isoform d                                                      | MRPL21   |         |          |           | 1        | 1          |        | 1        |
| Protein Group 270 | Q9NVU5   | 21265040  | NP_054899.2    | mitochondrial ribosomal protein L22 isoform a                                                      | MRPL22   |         |          |           | 1        | 1          |        | 1        |
| Protein Group 470 | Q16540   | 27436904  | NP_066957.2    | mitochondrial ribosomal protein L23                                                                | MRPL23   |         |          |           | 1        | 1          |        | 1        |
| Protein Group 248 | Q96A35   | 22035588  | NP_078816.2    | mitochondrial ribosomal protein L24                                                                | MRPL24   |         |          |           | 1        | 1          |        | 1        |
| Protein Group 650 | Q9POM9   | 22547129  | NP_683411.1    | mitochondrial ribosomal protein L27 isoform c                                                      | MRPL27   |         |          |           | 1        | 1          |        | 1        |
| Protein Group 98  | Q13084   | 26051229  | NP_006419.2    | mitochondrial ribosomal protein L28                                                                | MRPL28   |         |          |           | 1        | 1          |        | 1        |
| Protein Group 142 | P09001   | 6005862   | NP_009139.1    | mitochondrial ribosomal protein L3                                                                 | MRPL3    |         |          |           | 1        | 1          |        | 1        |
| Protein Group 356 | Q9BYC8   | 13994261  | NP_114109.1    | mitochondrial ribosomal protein L32                                                                | MRPL32   |         |          |           | 1        | 1          |        | 1        |
| Protein Group 544 | Q75394   | 4759048   | NP_004882.1    | mitochondrial ribosomal protein L33 isoform a                                                      | MRPL33   |         |          |           | 1        | 1          |        | 1        |
| Protein Group 83  | Q9RZ1    | 22547134  | NP_057575.2    | mitochondrial ribosomal protein L37                                                                | MRPL37   |         |          |           | 1        | 1          |        | 1        |
| Protein Group 169 | Q9BDV4   | 22165364  | NP_115867.1    | mitochondrial ribosomal protein L38                                                                | MRPL38   |         |          |           | 1        | 1          |        | 1        |
| Protein Group 218 | Q9NYK5   | 27886582  | NP_059142.2    | mitochondrial ribosomal protein L39 isoform a                                                      | MRPL39   |         |          |           | 1        | 1          |        | 1        |
| Protein Group 233 | Q9BYD3   | 22547138  | NP_666499.1    | mitochondrial ribosomal protein L4 isoform a                                                       | MRPL4    |         |          |           | 1        | 1          |        | 1        |
| Protein Group 432 | Q9NQ50   | 26638659  | NP_003767.2    | mitochondrial ribosomal protein L40                                                                | MRPL40   |         |          |           | 1        | 1          |        | 1        |
| Protein Group 428 | Q8M3M3   | 13899231  | NP_115866.1    | mitochondrial ribosomal protein L41                                                                | MRPL41   |         |          |           | 1        | 1          |        | 1        |
| Protein Group 268 | Q9NB83-4 | 28872734  | NP_115488.2    | mitochondrial ribosomal protein L43 isoform a                                                      | MRPL43   |         |          |           | 1        | 1          |        | 1        |
| Protein Group 115 | Q9HJ2    | 12597661  | NP_075066.1    | mitochondrial ribosomal protein L44                                                                | MRPL44   |         |          |           | 1        | 1          |        | 1        |
| Protein Group 224 | Q9BRJ2   | 34304322  | NP_115727.3    | mitochondrial ribosomal protein L45                                                                | MRPL45   |         |          |           | 1        | 1          |        | 1        |
| Protein Group 282 | Q9H2W6   | 26667177  | NP_071446.2    | mitochondrial ribosomal protein L46                                                                | MRPL46   |         |          |           | 1        | 1          |        | 1        |
| Protein Group 194 | Q9HD33   | 29826287  | NP_065142.2    | mitochondrial ribosomal protein L47 isoform a                                                      | MRPL47   |         |          |           | 1        | 1          |        | 1        |
| Protein Group 478 | Q9GGC5   | 7706333   | NP_057139.1    | mitochondrial ribosomal protein L48                                                                | MRPL48   |         |          |           | 1        | 1          |        | 1        |
| Protein Group 283 | Q13405   | 4825649   | NP_004918.1    | mitochondrial ribosomal protein L49                                                                | MRPL49   |         |          |           | 1        | 1          |        | 1        |
| Protein Group 177 | Q8NSN7   | 21265096  | NP_061924.1    | mitochondrial ribosomal protein L50                                                                | MRPL50   |         |          |           | 1        | 1          |        | 1        |
| Protein Group 460 | Q4UZR6   | 16950607  | NP_057581.2    | mitochondrial ribosomal protein L51                                                                | MRPL51   |         |          |           | 1        | 1          |        | 1        |
| Protein Group 613 | ABMY6    | 31083077  | NP_851823.1    | mitochondrial ribosomal protein L52 isoform d                                                      | MRPL52   |         |          |           | 1        | 1          |        | 1        |
| Protein Group 331 | Q96LL3   | 16596694  | NP_444278.1    | mitochondrial ribosomal protein L53                                                                | MRPL53   |         |          |           | 1        | 1          |        | 1        |
| Protein Group 426 | Q7Z7F7   | 31363366  | NP_852130.1    | mitochondrial ribosomal protein L55 isoform a                                                      | MRPL55   |         |          |           | 1        | 1          |        | 1        |
| Protein Group 232 | Q9BYD2   | 13899231  | NP_113608.1    | mitochondrial ribosomal protein L9                                                                 | MRPL9    |         |          |           | 1        | 1          |        | 1        |
| Protein Group 246 | P82664   | 16554607  | NP_060611.2    | mitochondrial ribosomal protein S10                                                                | MRPS10   |         |          |           | 1        | 1          |        | 1        |
| Protein Group 280 | P82912   | 16554609  | NP_073750.2    | mitochondrial ribosomal protein S11 isoform a                                                      | MRPS11   |         |          |           | 1        | 1          |        | 1        |
| Protein Group 420 | O15235   | 16950589  | NP_203526.1    | mitochondrial ribosomal protein S12 precursor                                                      | MRPS12   |         |          |           | 1        | 1          |        | 1        |
| Protein Group 386 | O60783   | 11559927  | NP_071383.1    | mitochondrial ribosomal protein S14                                                                | MRPS14   |         |          |           | 1        | 1          |        | 1        |
| Protein Group 148 | P82914   | 16554611  | NP_112570.2    | mitochondrial ribosomal protein S15                                                                | MRPS15   |         |          |           | 1        | 1          |        | 1        |
| Protein Group 253 | Q9Y3D3   | 7705626   |                |                                                                                                    |          |         |          |           |          |            |        |          |
