# Supplementary figures and images for: The human mitochondrial ribosome recycling factor is essential for cell viability
Source: PubMed Central journal article supplement — Nucleic Acids Res. 2008 Sep 9;36(18):5787–99. doi: 10.1093/nar/gkn576 (PMC2566884; doi:10.1093/nar/gkn576), 2008-09-09

Fig S2

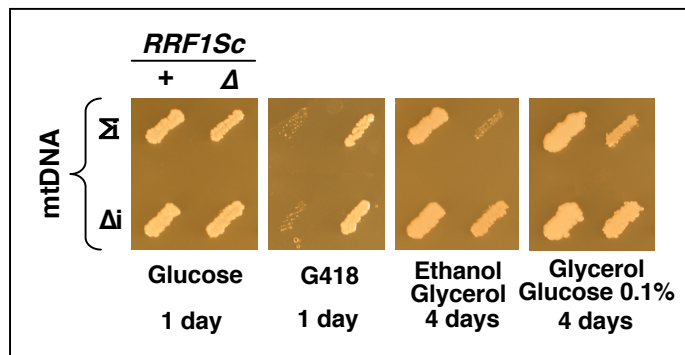

Supplement: gkn576_2.pdf [file gkn576_2.pdf]

# Fig S3

## A

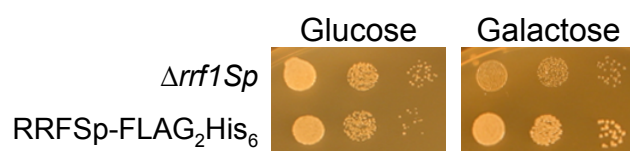

## B

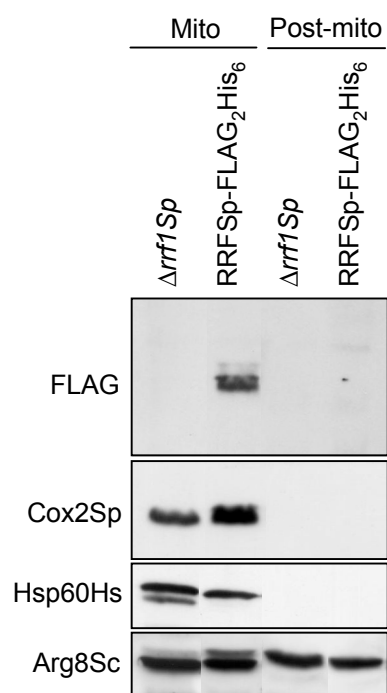

Supplement: gkn576_3.pdf [file gkn576_3.pdf]
